# Supplementary material for: The Role of Natural and Synthetic Flavonoids in the Prevention of Marine Biofouling
Source: MDPI journal article supplement (doi:10.3390/md22020077), 2024-02-02
Supplement: s1 [file s1]

## **Supplementary Material**

### **The role of natural and synthetic flavonoids in the prevention of marine biofouling**

**Daniela Pereira <sup>1,2</sup>, Madalena Pinto <sup>1,2</sup>, Joana R. Almeida <sup>2</sup>, Marta Correia-da-Silva <sup>1,2,\*</sup> and Honorina Cidade <sup>1,2,\*</sup>**

<sup>1</sup> Laboratory of Organic and Pharmaceutical Chemistry, Department of Chemical Sciences, Faculty of Pharmacy of the University of Porto, Rua de Jorge Viterbo Ferreira 228, 4050-313 Porto, Portugal

<sup>2</sup> Interdisciplinary Centre of Marine and Environmental Research (CIIMAR), University of Porto, Edifício do Terminal de Cruzeiros do Porto de Leixões, Avenida General Norton de Matos, S/N, 4450-208 Matosinhos, Portugal

\* Correspondence: m\_correiadasilva@ff.up.pt (M.C.-d.-S.), hcidade@ff.up.pt (H.C.)

**Table S1.** Structure, origin, and antifouling activity of flavonoids **1-106** reported in the review.

| Chalcones                                                                                                                                                                                                                                                                                                                                                                                                                                                                                                                                                                                                                                                                                                                                                                                                                                                                                                                                                                                                                                                                                                                                                                                                                                                                                                                                                                                                                                                                                                                                                                                                                                                                                                                                                                                                                                                                                                                                                                                                                                                                                                                                                                                                                                                                                                                                                                                                                                                                                                                                                                                                                                                                                                                                                                                                                                                                                                                                                                                                                                                                                                                                                                                                                                                                                                                                                                                                                                                                                                                                                                                                                                                                                                                                                                                                                                                                                                                                                                                                                                                                                                                                                                                                                                                                                                                                                                                                                                                                                                                                                                                                                                                                                                                                                                                                                                                                                                                                                                                                                                                                                                                                                                                                                                                                                                                                                                                                                                                                                                                                                                                                                                                                                                                                                                                                                                                                                                                                                                                                                                                                                                                                                                                                                                                                                                                                                                                                                                                                                                                                                |           |                                                                                                                                                                                                                                                                                                                                                                                                                                                                                                                   |                                      |
|----------------------------------------------------------------------------------------------------------------------------------------------------------------------------------------------------------------------------------------------------------------------------------------------------------------------------------------------------------------------------------------------------------------------------------------------------------------------------------------------------------------------------------------------------------------------------------------------------------------------------------------------------------------------------------------------------------------------------------------------------------------------------------------------------------------------------------------------------------------------------------------------------------------------------------------------------------------------------------------------------------------------------------------------------------------------------------------------------------------------------------------------------------------------------------------------------------------------------------------------------------------------------------------------------------------------------------------------------------------------------------------------------------------------------------------------------------------------------------------------------------------------------------------------------------------------------------------------------------------------------------------------------------------------------------------------------------------------------------------------------------------------------------------------------------------------------------------------------------------------------------------------------------------------------------------------------------------------------------------------------------------------------------------------------------------------------------------------------------------------------------------------------------------------------------------------------------------------------------------------------------------------------------------------------------------------------------------------------------------------------------------------------------------------------------------------------------------------------------------------------------------------------------------------------------------------------------------------------------------------------------------------------------------------------------------------------------------------------------------------------------------------------------------------------------------------------------------------------------------------------------------------------------------------------------------------------------------------------------------------------------------------------------------------------------------------------------------------------------------------------------------------------------------------------------------------------------------------------------------------------------------------------------------------------------------------------------------------------------------------------------------------------------------------------------------------------------------------------------------------------------------------------------------------------------------------------------------------------------------------------------------------------------------------------------------------------------------------------------------------------------------------------------------------------------------------------------------------------------------------------------------------------------------------------------------------------------------------------------------------------------------------------------------------------------------------------------------------------------------------------------------------------------------------------------------------------------------------------------------------------------------------------------------------------------------------------------------------------------------------------------------------------------------------------------------------------------------------------------------------------------------------------------------------------------------------------------------------------------------------------------------------------------------------------------------------------------------------------------------------------------------------------------------------------------------------------------------------------------------------------------------------------------------------------------------------------------------------------------------------------------------------------------------------------------------------------------------------------------------------------------------------------------------------------------------------------------------------------------------------------------------------------------------------------------------------------------------------------------------------------------------------------------------------------------------------------------------------------------------------------------------------------------------------------------------------------------------------------------------------------------------------------------------------------------------------------------------------------------------------------------------------------------------------------------------------------------------------------------------------------------------------------------------------------------------------------------------------------------------------------------------------------------------------------------------------------------------------------------------------------------------------------------------------------------------------------------------------------------------------------------------------------------------------------------------------------------------------------------------------------------------------------------------------------------------------------------------------------------------------------------------------------------------------------------|-----------|-------------------------------------------------------------------------------------------------------------------------------------------------------------------------------------------------------------------------------------------------------------------------------------------------------------------------------------------------------------------------------------------------------------------------------------------------------------------------------------------------------------------|--------------------------------------|
| Code and structure of Flavonoid                                                                                                                                                                                                                                                                                                                                                                                                                                                                                                                                                                                                                                                                                                                                                                                                                                                                                                                                                                                                                                                                                                                                                                                                                                                                                                                                                                                                                                                                                                                                                                                                                                                                                                                                                                                                                                                                                                                                                                                                                                                                                                                                                                                                                                                                                                                                                                                                                                                                                                                                                                                                                                                                                                                                                                                                                                                                                                                                                                                                                                                                                                                                                                                                                                                                                                                                                                                                                                                                                                                                                                                                                                                                                                                                                                                                                                                                                                                                                                                                                                                                                                                                                                                                                                                                                                                                                                                                                                                                                                                                                                                                                                                                                                                                                                                                                                                                                                                                                                                                                                                                                                                                                                                                                                                                                                                                                                                                                                                                                                                                                                                                                                                                                                                                                                                                                                                                                                                                                                                                                                                                                                                                                                                                                                                                                                                                                                                                                                                                                                                          | Origin    | Activity                                                                                                                                                                                                                                                                                                                                                                                                                                                                                                          | Reference                            |
| 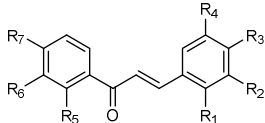 <p> <b>1:</b> R<sub>1</sub>=R<sub>2</sub>=R<sub>4</sub>=R<sub>5</sub>=R<sub>6</sub>=R<sub>7</sub>=H; R<sub>3</sub>=NMe<sub>2</sub><br/> <b>2:</b> R<sub>1</sub>=R<sub>2</sub>=R<sub>4</sub>=R<sub>5</sub>=R<sub>6</sub>=R<sub>7</sub>=H; R<sub>3</sub>=SMe<br/> <b>3:</b> R<sub>1</sub>=R<sub>2</sub>=R<sub>4</sub>=R<sub>5</sub>=R<sub>6</sub>=H; R<sub>3</sub>=SMe; R<sub>7</sub>=NO<sub>2</sub><br/> <b>4:</b> R<sub>1</sub>=R<sub>2</sub>=R<sub>3</sub>=R<sub>4</sub>=R<sub>5</sub>=R<sub>6</sub>=R<sub>7</sub>=H<br/> <b>5:</b> R<sub>1</sub>=R<sub>2</sub>=R<sub>4</sub>=R<sub>5</sub>=R<sub>6</sub>=H; R<sub>3</sub>=SMe; R<sub>7</sub>=OH<br/> <b>6:</b> R<sub>1</sub>=R<sub>2</sub>=R<sub>4</sub>=R<sub>5</sub>=R<sub>6</sub>=H; R<sub>3</sub>=SMe; R<sub>7</sub>=OMe<br/> <b>7:</b> R<sub>1</sub>=R<sub>2</sub>=R<sub>4</sub>=R<sub>5</sub>=R<sub>6</sub>=H; R<sub>3</sub>=SMe; R<sub>7</sub>=OH<br/> <b>8:</b> R<sub>1</sub>=R<sub>2</sub>=R<sub>4</sub>=R<sub>5</sub>=R<sub>6</sub>=H; R<sub>3</sub>=SMe; R<sub>7</sub>=Me<br/> <b>9:</b> R<sub>1</sub>=R<sub>2</sub>=R<sub>4</sub>=R<sub>5</sub>=R<sub>6</sub>=H; R<sub>3</sub>=SMe; R<sub>7</sub>=Cl<br/> <b>10:</b> R<sub>1</sub>=R<sub>2</sub>=R<sub>4</sub>=R<sub>5</sub>=R<sub>6</sub>=H; R<sub>3</sub>=SMe; R<sub>7</sub>=NO<sub>2</sub><br/> <b>11:</b> R<sub>1</sub>=R<sub>2</sub>=R<sub>4</sub>=R<sub>5</sub>=R<sub>6</sub>=R<sub>7</sub>=H; R<sub>3</sub>=OMe<br/> <b>12:</b> R<sub>1</sub>=R<sub>2</sub>=R<sub>4</sub>=R<sub>5</sub>=R<sub>6</sub>=H; R<sub>3</sub>=SMe; R<sub>7</sub>=Cl<br/> <b>13:</b> R<sub>1</sub>=OMe; R<sub>2</sub>=R<sub>3</sub>=R<sub>4</sub>=R<sub>5</sub>=R<sub>6</sub>=R<sub>7</sub>=H<br/> <b>14:</b> R<sub>1</sub>=R<sub>2</sub>=R<sub>4</sub>=R<sub>5</sub>=R<sub>6</sub>=H; R<sub>3</sub>=SMe; R<sub>7</sub>=Br<br/> <b>15:</b> R<sub>1</sub>=R<sub>5</sub>=R<sub>6</sub>=R<sub>7</sub>=H; R<sub>3</sub>=R<sub>2</sub>=R<sub>4</sub>=OMe<br/> <b>16:</b> R<sub>1</sub>=R<sub>2</sub>=R<sub>4</sub>=R<sub>5</sub>=R<sub>6</sub>=H; R<sub>3</sub>=SMe; R<sub>7</sub>=OH<br/> <b>17:</b> R<sub>1</sub>=R<sub>2</sub>=R<sub>6</sub>=H; R<sub>3</sub>=R<sub>4</sub>=OMe; R<sub>5</sub>=R<sub>7</sub>=Cl<br/> <b>18:</b> R<sub>2</sub>=R<sub>4</sub>=R<sub>5</sub>=R<sub>7</sub>=H; R<sub>1</sub>=R<sub>3</sub>=OMe; R<sub>6</sub>=NO<sub>2</sub><br/> <b>19:</b> R<sub>1</sub>=R<sub>2</sub>=R<sub>6</sub>=R<sub>7</sub>=H; R<sub>3</sub>=R<sub>4</sub>=OMe; R<sub>5</sub>=NO<sub>2</sub><br/> <b>20:</b> R<sub>1</sub>=R<sub>2</sub>=R<sub>4</sub>=R<sub>5</sub>=R<sub>6</sub>=H; R<sub>3</sub>=NMe<sub>2</sub>; R<sub>7</sub>=NO<sub>2</sub><br/> <b>21:</b> R<sub>1</sub>=OMe; R<sub>2</sub>=R<sub>3</sub>=R<sub>4</sub>=R<sub>5</sub>=R<sub>6</sub>=H; R<sub>7</sub>=NO<sub>2</sub><br/> <b>22:</b> R<sub>1</sub>=R<sub>2</sub>=R<sub>4</sub>=R<sub>5</sub>=H; R<sub>3</sub>=NMe<sub>2</sub>; R<sub>6</sub>=R<sub>7</sub>=Cl<br/> <b>23:</b> R<sub>1</sub>=R<sub>2</sub>=R<sub>4</sub>=R<sub>5</sub>=R<sub>7</sub>=H; R<sub>3</sub>=OMe; R<sub>6</sub>=OH<br/> <b>24:</b> R<sub>1</sub>=OMe; R<sub>2</sub>=R<sub>3</sub>=R<sub>4</sub>=R<sub>5</sub>=R<sub>7</sub>=H; R<sub>6</sub>=NO<sub>2</sub><br/> <b>25:</b> R<sub>1</sub>=R<sub>3</sub>=R<sub>4</sub>=R<sub>5</sub>=H; R<sub>2</sub>=NO<sub>2</sub>; R<sub>6</sub>-R<sub>7</sub>=-O-CH<sub>2</sub>-O-<br/> <b>26:</b> R<sub>1</sub>=R<sub>2</sub>=R<sub>4</sub>=R<sub>5</sub>=R<sub>7</sub>=H; R<sub>3</sub>=Cl; R<sub>6</sub>=NO<sub>2</sub><br/> <b>27:</b> R<sub>1</sub>=R<sub>3</sub>=R<sub>4</sub>=R<sub>5</sub>=R<sub>7</sub>=H; R<sub>2</sub>=NO<sub>2</sub>; R<sub>6</sub>=Br<br/> <b>28:</b> R<sub>1</sub>=Cl; R<sub>2</sub>=R<sub>3</sub>=R<sub>4</sub>=R<sub>5</sub>=R<sub>7</sub>=H; R<sub>6</sub>=OMe<br/> <b>29:</b> R<sub>1</sub>=Cl; R<sub>2</sub>=R<sub>3</sub>=R<sub>4</sub>=R<sub>5</sub>=R<sub>6</sub>=H; R<sub>7</sub>=OEt<br/> <b>30:</b> R<sub>1</sub>=R<sub>2</sub>=R<sub>4</sub>=R<sub>5</sub>=R<sub>6</sub>=R<sub>7</sub>=H; R<sub>3</sub>=SO<sub>2</sub>CH<sub>3</sub><br/> <b>31:</b> R<sub>1</sub>=R<sub>2</sub>=R<sub>4</sub>=R<sub>5</sub>=R<sub>6</sub>=H; R<sub>3</sub>=SO<sub>2</sub>CH<sub>3</sub>; R<sub>7</sub>=NO<sub>2</sub><br/> <b>32:</b> R<sub>1</sub>=R<sub>2</sub>=R<sub>4</sub>=R<sub>5</sub>=R<sub>6</sub>=H; R<sub>3</sub>=SO<sub>2</sub>CH<sub>3</sub>; R<sub>7</sub>=Cl<br/> <b>33:</b> R<sub>1</sub>=R<sub>2</sub>=R<sub>4</sub>=R<sub>5</sub>=H; R<sub>3</sub>=SO<sub>2</sub>CH<sub>3</sub>; R<sub>6</sub>=R<sub>7</sub>=Cl<br/> <b>34:</b> R<sub>1</sub>=R<sub>5</sub>=R<sub>7</sub>=Cl; R<sub>2</sub>=R<sub>3</sub>=R<sub>4</sub>=R<sub>6</sub>=H<br/> <b>35:</b> R<sub>1</sub>=Cl; R<sub>2</sub>=R<sub>3</sub>=R<sub>4</sub>=R<sub>5</sub>=R<sub>7</sub>=H; R<sub>6</sub>=NO<sub>2</sub><br/> <b>36:</b> R<sub>1</sub>=Cl; R<sub>2</sub>=R<sub>3</sub>=R<sub>4</sub>=R<sub>5</sub>=R<sub>7</sub>=H; R<sub>6</sub>=OH<br/> <b>37:</b> R<sub>1</sub>=R<sub>2</sub>=R<sub>4</sub>=R<sub>5</sub>=H; R<sub>3</sub>=SMe; R<sub>6</sub>-R<sub>7</sub>=-O-CH<sub>2</sub>-O-<br/> <b>38:</b> R<sub>1</sub>=R<sub>2</sub>=R<sub>4</sub>=R<sub>5</sub>=R<sub>7</sub>=H; R<sub>3</sub>=SMe; R<sub>6</sub>=NH<sub>2</sub><br/> <b>39:</b> R<sub>1</sub>=R<sub>2</sub>=R<sub>4</sub>=R<sub>5</sub>=H; R<sub>3</sub>=SMe; R<sub>6</sub>=R<sub>7</sub>=OMe<br/> <b>40:</b> R<sub>1</sub>=R<sub>2</sub>=R<sub>4</sub>=R<sub>5</sub>=R<sub>7</sub>=H; R<sub>3</sub>=SMe; R<sub>6</sub>=OMe<br/> <b>41:</b> R<sub>1</sub>=R<sub>2</sub>=R<sub>4</sub>=R<sub>5</sub>=R<sub>6</sub>=H; R<sub>3</sub>=SMe; R<sub>7</sub>=OEt<br/> <b>42:</b> R<sub>1</sub>=R<sub>2</sub>=R<sub>4</sub>=R<sub>5</sub>=R<sub>7</sub>=H; R<sub>3</sub>=SMe; R<sub>6</sub>=Br<br/> <b>43:</b> R<sub>1</sub>=R<sub>2</sub>=R<sub>4</sub>=R<sub>5</sub>=R<sub>6</sub>=H; R<sub>3</sub>=SMe; R<sub>7</sub>=F<br/> <b>44:</b> R<sub>1</sub>=Cl; R<sub>2</sub>=R<sub>3</sub>=R<sub>4</sub>=R<sub>5</sub>=H; R<sub>6</sub>-R<sub>7</sub>=-O-CH<sub>2</sub>-O-<br/> <b>45:</b> R<sub>1</sub>=OMe; R<sub>2</sub>=R<sub>3</sub>=R<sub>4</sub>=R<sub>5</sub>=H; SMe; R<sub>6</sub>=R<sub>7</sub>=Cl<br/> <b>46:</b> R<sub>1</sub>=R<sub>2</sub>=R<sub>4</sub>=R<sub>5</sub>=H; R<sub>3</sub>=OMe; R<sub>6</sub>-R<sub>7</sub>=-O-CH<sub>2</sub>-O-<br/> <b>47:</b> R<sub>1</sub>=R<sub>2</sub>=R<sub>4</sub>=R<sub>5</sub>=H; R<sub>3</sub>=OH; R<sub>6</sub>-R<sub>7</sub>=-O-CH<sub>2</sub>-O- </p> | Synthesis | <p>- <i>Bacillus flexus</i>: MIC = 0.002 – 0.466 μM</p> <p>- <i>Pseudomonas fluorescens</i>: MIC = 0.004 – 0.133 μM</p> <p>- <i>Vibrio natriegens</i>: MIC = 0.024 – 0.249 μM</p>                                                                                                                                                                                                                                                                                                                                 | (Sivakumar, Prabhawathi et al. 2010) |
|                                                                                                                                                                                                                                                                                                                                                                                                                                                                                                                                                                                                                                                                                                                                                                                                                                                                                                                                                                                                                                                                                                                                                                                                                                                                                                                                                                                                                                                                                                                                                                                                                                                                                                                                                                                                                                                                                                                                                                                                                                                                                                                                                                                                                                                                                                                                                                                                                                                                                                                                                                                                                                                                                                                                                                                                                                                                                                                                                                                                                                                                                                                                                                                                                                                                                                                                                                                                                                                                                                                                                                                                                                                                                                                                                                                                                                                                                                                                                                                                                                                                                                                                                                                                                                                                                                                                                                                                                                                                                                                                                                                                                                                                                                                                                                                                                                                                                                                                                                                                                                                                                                                                                                                                                                                                                                                                                                                                                                                                                                                                                                                                                                                                                                                                                                                                                                                                                                                                                                                                                                                                                                                                                                                                                                                                                                                                                                                                                                                                                                                                                          | Synthesis | Reduction of the adhesion of the marine bacterium <i>V. natriegens</i> for marine paints with chalcone <b>45</b> comparing to control paint and paint with copper: Polymer surfaces coated with the paint without additives exhibited an amount of colony forming unit (CFU) of 30 – 40×10 <sup>6</sup> /mL after 28 days of assay, followed by surfaces with paint mixed with copper (20 – 40×10 <sup>6</sup> /mL) and the surfaces with chalcone <b>45</b> mixed paint (1×10 <sup>6</sup> /mL).                 | (Sivakumar, Prabhawathi et al. 2010) |
|                                                                                                                                                                                                                                                                                                                                                                                                                                                                                                                                                                                                                                                                                                                                                                                                                                                                                                                                                                                                                                                                                                                                                                                                                                                                                                                                                                                                                                                                                                                                                                                                                                                                                                                                                                                                                                                                                                                                                                                                                                                                                                                                                                                                                                                                                                                                                                                                                                                                                                                                                                                                                                                                                                                                                                                                                                                                                                                                                                                                                                                                                                                                                                                                                                                                                                                                                                                                                                                                                                                                                                                                                                                                                                                                                                                                                                                                                                                                                                                                                                                                                                                                                                                                                                                                                                                                                                                                                                                                                                                                                                                                                                                                                                                                                                                                                                                                                                                                                                                                                                                                                                                                                                                                                                                                                                                                                                                                                                                                                                                                                                                                                                                                                                                                                                                                                                                                                                                                                                                                                                                                                                                                                                                                                                                                                                                                                                                                                                                                                                                                                          | Synthesis | Paints containing chalcone <b>4</b> (1.25 mmol chalcone/100 g of paint) were able to inhibit the settlement and growth of diatoms <i>Achnanthes</i> sp., <i>Coscinodiscus</i> sp., <i>Grammatophora</i> sp., <i>Licmophora</i> sp., <i>Navicula</i> sp., <i>Nitzschia longissima</i> , <i>Pinnularia</i> sp., <i>Pleurosigma</i> sp., <i>Synedra</i> sp. and <i>Skeletonema costatum</i> , and protozoans such as <i>Vorticella</i> sp. and <i>Zoothamnium</i> sp. by about 70% in comparison with control paint. | (Sathicq, Paola et al. 2019)         |

|                                                                                                                                                                                                                                                                                                                                                                                                                                                                                               |                  |                                                                                                                                                                                                                                                                                                                                                                                                                                                                                                                                                                                                                                                                                                                                                                                                           |                                       |
|-----------------------------------------------------------------------------------------------------------------------------------------------------------------------------------------------------------------------------------------------------------------------------------------------------------------------------------------------------------------------------------------------------------------------------------------------------------------------------------------------|------------------|-----------------------------------------------------------------------------------------------------------------------------------------------------------------------------------------------------------------------------------------------------------------------------------------------------------------------------------------------------------------------------------------------------------------------------------------------------------------------------------------------------------------------------------------------------------------------------------------------------------------------------------------------------------------------------------------------------------------------------------------------------------------------------------------------------------|---------------------------------------|
| 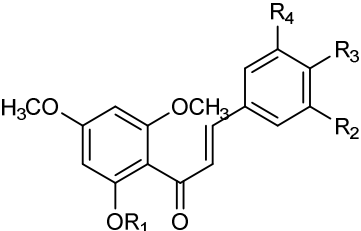 <p> <b>48:</b> R<sub>1</sub>=R<sub>2</sub>=R<sub>4</sub>=H, R<sub>3</sub>=OCH<sub>3</sub><br/> <b>49:</b> R<sub>1</sub>=R<sub>3</sub>=R<sub>4</sub>=H, R<sub>2</sub>=OCH<sub>3</sub><br/> <b>50:</b> R<sub>1</sub>=Prenyl, R<sub>2</sub>=R<sub>3</sub>=R<sub>4</sub>=OCH<sub>3</sub> </p>                                                                                                                   | <p>Synthesis</p> | <p><b>48:</b> <i>Mytilus galloprovincialis</i> mussel larvae, EC<sub>50</sub>: 34.63 μM</p> <p><b>49:</b> <i>M. galloprovincialis</i> (EC<sub>50</sub>: 7.24 μM); bacterial growth inhibitory activity against <i>Halomonas aquamarina</i> (EC<sub>50</sub>: 18.67 μM) and <i>Roseobacter litoralis</i> (EC<sub>50</sub>: 4.09 μM)</p> <p><b>50:</b> <i>M. galloprovincialis</i> (EC<sub>50</sub>: 16.48 μM); growth inhibitory activity against <i>H. aquamarina</i> (EC<sub>50</sub>: 18.78 μM) and <i>R. litoralis</i> (EC<sub>50</sub>: 12.34 μM); diatom inhibitory activity against <i>Cylindrotheca</i> sp. (EC<sub>50</sub>: 7.04 μM), <i>Halamphora</i> sp. (EC<sub>50</sub>: 14.65 μM), <i>Nitzschia</i> sp. (EC<sub>50</sub>: 20.31 μM) and <i>Navicula</i> sp. (EC<sub>50</sub>: 6.75 μM)</p> | <p>(Almeida, Moreira et al. 2018)</p> |
|  <p> <b>51:</b> R<sub>1</sub>=R<sub>2</sub>=R<sub>3</sub>=H<br/> <b>52:</b> R<sub>1</sub>=R<sub>2</sub>=H; R<sub>3</sub>=Me<br/> <b>53:</b> R<sub>1</sub>=R<sub>3</sub>=H; R<sub>2</sub>=Me<br/> <b>54:</b> R<sub>1</sub>=H; R<sub>2</sub>=R<sub>3</sub>=Me<br/> <b>55:</b> R<sub>1</sub>=OH; R<sub>2</sub>=R<sub>3</sub>=H<br/> <b>56:</b> R<sub>1</sub>=OH; R<sub>2</sub>=H; R<sub>3</sub>=Me         </p> | <p>Synthesis</p> | <p>Paints containing chalcones <b>51-56</b> (1.25 mmol chalcone/100 g of paint) were able to inhibit the settlement and growth of diatoms <i>Achnanthes</i> sp., <i>Coscinodiscus</i> sp., <i>Grammatophora</i> sp., <i>Licmophora</i> sp., <i>Navicula</i> sp., <i>Nitzschia longissima</i>, <i>Pinnularia</i> sp., <i>Pleurosigma</i> sp., <i>Synedra</i> sp. and <i>Skeletonema costatum</i>, and protozoans <i>Vorticella</i> sp. and <i>Zoothamnium</i> sp. by about 60-80% and the settlement of filamentous red alga <i>Polysiphonia</i> sp., green alga <i>Ulva</i> sp., and filamentous brown alga <i>Ectocarpus</i> sp. and calcareous tubeworms <i>Hydroides</i> sp. and <i>Spirorbis</i> sp. by about 75-~100% in comparison with control paint.</p>                                          | <p>(Sathicq, Paola et al. 2019)</p>   |

| 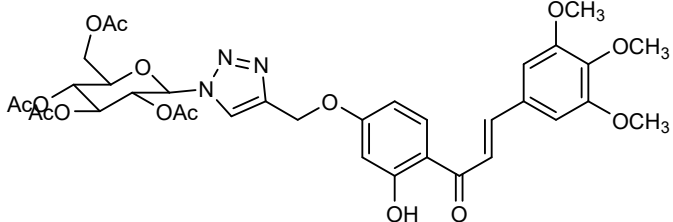 <p style="text-align: center;"><b>57</b></p>                                                                                                                                                                                                                          | Synthesis                                          | <p>Activity against mussel <i>M. galloprovincialis</i> (<math>EC_{50}</math> = 3.28 <math>\mu</math>M, 2.43 <math>\mu</math>g/mL).</p> <p>Activity against diatom <i>Navicula</i> sp. (<math>EC_{50}</math> = 41.76 <math>\mu</math>M, 30.94 <math>\mu</math>g/mL)</p>                                                                                                                                                                                                                                                                          | (Pereira, Gonçalves et al. 2021) |
|---------------------------------------------------------------------------------------------------------------------------------------------------------------------------------------------------------------------------------------------------------------------------------------------------------------------------------------------------------|----------------------------------------------------|-------------------------------------------------------------------------------------------------------------------------------------------------------------------------------------------------------------------------------------------------------------------------------------------------------------------------------------------------------------------------------------------------------------------------------------------------------------------------------------------------------------------------------------------------|----------------------------------|
|  <p><b>58:</b> R<sub>1</sub>=OH, R<sub>2</sub>=H<br/> <b>59:</b> R<sub>1</sub>=OH, R<sub>2</sub>=OCH<sub>3</sub><br/> <b>60:</b> R<sub>1</sub>=OCH<sub>2</sub>CCH, R<sub>2</sub>=H<br/> <b>61:</b> R<sub>1</sub>=OCH<sub>2</sub>CCH, R<sub>2</sub>=OCH<sub>3</sub></p> | Synthesis                                          | <p><b>58:</b> activity against <i>M. galloprovincialis</i> (<math>EC_{50}</math> = 18.10 <math>\mu</math>M, 5.44 <math>\mu</math>g/mL).</p> <p><b>59:</b> activity against <i>M. galloprovincialis</i> (<math>EC_{50}</math> = 9.64 <math>\mu</math>M, 3.18 <math>\mu</math>g/mL).</p> <p><b>60:</b> bacterial inhibitory activity against <i>R. litoralis</i> (<math>EC_{50}</math> = 135 <math>\mu</math>M).</p> <p><b>61:</b> bacterial inhibitory activity against <i>R. litoralis</i> (<math>EC_{50}</math> = 83.5 <math>\mu</math>M).</p> | (Pereira, Gonçalves et al. 2021) |
| Flavonols                                                                                                                                                                                                                                                                                                                                               |                                                    |                                                                                                                                                                                                                                                                                                                                                                                                                                                                                                                                                 |                                  |
| Code and structure of Flavonoid                                                                                                                                                                                                                                                                                                                         | Origin                                             | Activity                                                                                                                                                                                                                                                                                                                                                                                                                                                                                                                                        | Reference                        |
|  <p>kaempferol 3-O-(2'',6''-di-O-(<i>E</i>)-<i>p</i>-coumaroyl-<math>\beta</math>-<i>D</i>-glucopyranoside (<b>62</b>))</p>                                                                                                                                          | Isolated from the leaves of <i>Quercus dentata</i> | <p>Anti-settlement activity against the blue mussel <i>Mytilus edulis</i> at 0.22 <math>\mu</math>mol/cm<sup>2</sup>, higher than positive control copper sulfate (0.50 <math>\mu</math>mol/cm<sup>2</sup>)</p>                                                                                                                                                                                                                                                                                                                                 | (Yamashita, Etoh et al. 1989)    |

|                                                                                                                                                                                                 |                                                                                                  |                                                                                                                                                                                                                                                                                                                                                                                                                                                                                                                                                                                                                                                                                         |                                           |
|-------------------------------------------------------------------------------------------------------------------------------------------------------------------------------------------------|--------------------------------------------------------------------------------------------------|-----------------------------------------------------------------------------------------------------------------------------------------------------------------------------------------------------------------------------------------------------------------------------------------------------------------------------------------------------------------------------------------------------------------------------------------------------------------------------------------------------------------------------------------------------------------------------------------------------------------------------------------------------------------------------------------|-------------------------------------------|
| 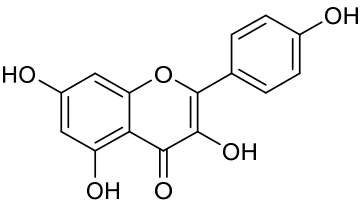 <p>kaempferol (<b>63</b>)</p>                                                                                 | Commercial                                                                                       | Anti-settlement activity against the blue mussel <i>M. edulis</i> at 6.0 $\mu\text{mol}/\text{cm}^2$ , lower than positive control copper sulfate (0.50 $\mu\text{mol}/\text{cm}^2$ )                                                                                                                                                                                                                                                                                                                                                                                                                                                                                                   | (Yamashita, Etoh et al. 1989)             |
|                                                                                                                                                                                                 | Commercial                                                                                       | Low anti-settlement activity against blue mussel <i>M. edulis</i> (8% of positive control copper sulfate).                                                                                                                                                                                                                                                                                                                                                                                                                                                                                                                                                                              | (Singh, Etoh et al. 1997)                 |
|                                                                                                                                                                                                 | Isolated from the terrestrial plant <i>Micromelum integerrinum</i>                               | Anti-settlement activity against the barnacle <i>Amphibalanus amphitrite</i> larvae ( $\text{EC}_{50}$ : 33.54 $\mu\text{M}$ , 9.6 $\mu\text{g}/\text{mL}$ ; $\text{LC}_{50}/\text{EC}_{50} > 5.2$ )                                                                                                                                                                                                                                                                                                                                                                                                                                                                                    | (Zhou, Zhang et al. 2009)                 |
|                                                                                                                                                                                                 | Isolated from the methanol extract of the leaves of the marine halophyte <i>Apocynum venetum</i> | Activity against marine bacteria <i>Bacillus thuringiensis</i> , <i>Pseudoalteromonas elyakovii</i> and <i>Pseudomonas aeruginosa</i> at a concentration of 100 $\mu\text{g}/\text{disc}$ (inhibition zone 9.5 – 17.4 mm), (positive control chloramphenicol at 100 $\mu\text{g}/\text{disc}$ : inhibition zone 29.2 – 33.7 mm)                                                                                                                                                                                                                                                                                                                                                         | (Kong, Fang et al. 2014)                  |
|  <p>Quercetin (<b>64</b>): <math>\text{R}_1=\text{R}_3=\text{H}</math>, <math>\text{R}_2=\text{OH}</math></p> | Commercial                                                                                       | Low anti-settlement activity against blue mussel <i>M. edulis</i> (12% comparing to positive control copper sulfate).                                                                                                                                                                                                                                                                                                                                                                                                                                                                                                                                                                   | (Singh, Etoh et al. 1997)                 |
|                                                                                                                                                                                                 | Isolated from the methanol extract of the leaves of the halophyte <i>Apocynum venetum</i>        | Activity against <i>B. thuringiensis</i> , <i>P. elyakovii</i> and <i>P. aeruginosa</i> at 100 $\mu\text{g}/\text{disc}$ (inhibition zone 9.3 – 9.5 mm) (positive control chloramphenicol at 100 $\mu\text{g}/\text{disc}$ : inhibition zone 29.2 – 33.7 mm)                                                                                                                                                                                                                                                                                                                                                                                                                            | (Kong, Fang et al. 2014)                  |
|                                                                                                                                                                                                 | Isolated from the marine-derived actinobacterium, <i>Streptomyces fradiae</i> PE7                | Activity against marine bacteria <i>Staphylococcus</i> sp. M1 (MIC: 5.36 $\mu\text{M}$ , 1.62 $\mu\text{g}/\text{mL}$ ), <i>Micrococcus</i> sp. M50 (MIC: 10.34 $\mu\text{M}$ , 3.125 $\mu\text{g}/\text{mL}$ ), <i>Lactobacillus</i> sp. M6 (MIC: 10.34 $\mu\text{M}$ , 3.125 $\mu\text{g}/\text{mL}$ ), <i>Bacillus</i> sp. N16 (MIC: 5.36 $\mu\text{M}$ , 1.62 $\mu\text{g}/\text{mL}$ ), <i>Aeromonas</i> sp. N8 (MIC: 20.68 $\mu\text{M}$ , 6.25 $\mu\text{g}/\text{mL}$ ), <i>Alcaligenes</i> sp. P2 (MIC: 20.68 $\mu\text{M}$ , 6.25 $\mu\text{g}/\text{mL}$ ), <i>Alcaligenes</i> sp. N22 (MIC: 20.68 $\mu\text{M}$ , 6.25 $\mu\text{g}/\text{mL}$ ), <i>Alcaligenes</i> sp. E4 | (Gopikrishnan, Radhakrishnan et al. 2016) |

|                                                                                                                                                                              |            |                                                                                                                                                                                                                                                                                                                                                                                                                                                                                            |                           |
|------------------------------------------------------------------------------------------------------------------------------------------------------------------------------|------------|--------------------------------------------------------------------------------------------------------------------------------------------------------------------------------------------------------------------------------------------------------------------------------------------------------------------------------------------------------------------------------------------------------------------------------------------------------------------------------------------|---------------------------|
|                                                                                                                                                                              |            | (MIC: 20.68 $\mu$ M, 6.25 $\mu$ g/mL), <i>Vibrio</i> sp. M25 (MIC: 41.36 $\mu$ M, 12.5 $\mu$ g/mL), <i>Pseudomonas</i> sp. P1 (MIC: 82.72 $\mu$ M, 25 $\mu$ g/mL), <i>Pseudomonas</i> sp. N9 (MIC: 82.72 $\mu$ M, 25 $\mu$ g/mL) and <i>Kurthia</i> sp. P3 (MIC: 41.36 $\mu$ M, 12.5 $\mu$ g/mL);<br>Inhibition of the <i>Anabaena</i> sp. and <i>Nostoc</i> sp. spore germination at 100 $\mu$ g/mL and the adherence of the <i>Perna indica</i> mussel foot at $306 \pm 19.6$ $\mu$ g/mL |                           |
| 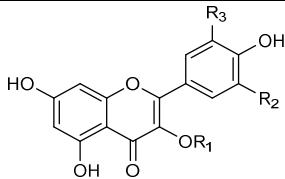 <p>Myricetin (<b>65</b>): <math>R_1=H</math>, <math>R_2=R_3=OH</math></p>                  | Commercial | Low anti-settlement activity against <i>M. edulis</i> (8% comparing to positive control copper sulfate).                                                                                                                                                                                                                                                                                                                                                                                   | (Singh, Etoh et al. 1997) |
|  <p>Kaempferol-3-O-rhamnoside (<b>66</b>): <math>R_1=Rha</math>, <math>R_2=R_3=H</math></p> | Commercial | Anti-settlement activity against <i>M. edulis</i> (10% of positive control copper sulfate).                                                                                                                                                                                                                                                                                                                                                                                                | (Singh, Etoh et al. 1997) |
|  <p>Kaempferol-3-O-glucoside (<b>67</b>): <math>R_1=Glu</math>, <math>R_2=R_3=H</math></p> | Commercial | Low anti-settlement activity against mussel <i>M. edulis</i> (5% of positive control copper sulfate).                                                                                                                                                                                                                                                                                                                                                                                      | (Singh, Etoh et al. 1997) |

|                                                                                                                                                                                     |                                                                    |                                                                                                                                                                |                           |
|-------------------------------------------------------------------------------------------------------------------------------------------------------------------------------------|--------------------------------------------------------------------|----------------------------------------------------------------------------------------------------------------------------------------------------------------|---------------------------|
| 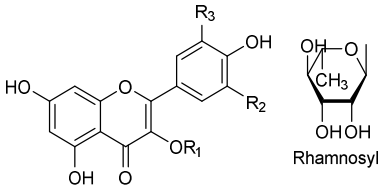 <p>Quercitrin (<b>68</b>): R<sub>1</sub>=Rha, R<sub>2</sub>=OH, R<sub>3</sub>=H</p>               | Commercial                                                         | Anti-settlement activity against mussel <i>M. edulis</i> (20% of positive control copper sulfate).                                                             | (Singh, Etoh et al. 1997) |
|  <p>Neoisorutin (<b>69</b>): R<sub>1</sub>=Glc-Rha, R<sub>2</sub>=OH, R<sub>3</sub>=H</p>          | Commercial                                                         | Anti-settlement activity against mussel <i>M. edulis</i> (19% of positive control copper sulfate).                                                             | (Singh, Etoh et al. 1997) |
|                                                                                                                                                                                     | Isolated from the terrestrial plant <i>Micromelum integerrinum</i> | Barnacle <i>A. amphitrite</i> larvae (EC <sub>50</sub> : 65.68 µM, 40.1 µg/mL; LC <sub>50</sub> /EC <sub>50</sub> > 5.0)                                       | (Zhou, Zhang et al. 2009) |
|  <p>Calycopterin (<b>70</b>): R<sub>1</sub>=OCH<sub>3</sub>, R<sub>2</sub>=H, R<sub>3</sub>=OH</p> | Isolated from the terrestrial plant <i>Micromelum integerrinum</i> | Barnacle <i>A. amphitrite</i> larvae (EC <sub>50</sub> : 9.08 µM, 3.4 µg/mL; LC <sub>50</sub> /EC <sub>50</sub> > 14.7)                                        | (Zhou, Zhang et al. 2009) |
|  <p>Casticin (<b>71</b>): R<sub>1</sub>=H, R<sub>2</sub>=OH, R<sub>3</sub>=OCH<sub>3</sub></p>    | Isolated from the terrestrial plant <i>Micromelum integerrinum</i> | Barnacle <i>A. amphitrite</i> larvae (EC <sub>50</sub> : 8.01 µM, 3.0 µg/mL; LC <sub>50</sub> /EC <sub>50</sub> > 16.7)                                        | (Zhou, Zhang et al. 2009) |
|                                                                                                                                                                                     | Commercial                                                         | Antidiatom activity against <i>N. leavisissima</i> (EC <sub>50</sub> : 38.65 µM, 14.47 µg/mL) and <i>C. socialis</i> (EC <sub>50</sub> : 19.53 µM, 7.31 µg/mL) | (Haider, Ma et al. 2020)  |
|  <p><b>72</b>: R<sub>1</sub>=R<sub>2</sub>=H, R<sub>3</sub>=OH</p>                               | Isolated from the terrestrial plant <i>Micromelum integerrinum</i> | Barnacle <i>A. amphitrite</i> (EC <sub>50</sub> : 7.26 µM, 2.5 µg/mL; LC <sub>50</sub> /EC <sub>50</sub> > 20.0)                                               | (Zhou, Zhang et al. 2009) |

|                                                                                                                                                    |                                                                        |                                                                                                                                                                                                                    |                                                |
|----------------------------------------------------------------------------------------------------------------------------------------------------|------------------------------------------------------------------------|--------------------------------------------------------------------------------------------------------------------------------------------------------------------------------------------------------------------|------------------------------------------------|
| 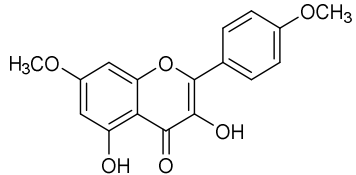 <p style="text-align: center;"><b>73</b></p>                     | <p>Isolated from the plant <i>Clausena dunniana</i></p>                | <p>Barnacle <i>A. amphitrite</i> (EC<sub>50</sub>: 37.54 μM, 11.8 μg/mL; LC<sub>50</sub>/EC<sub>50</sub> &gt; 4.2)</p>                                                                                             | <p>(Zhou, Zhang et al. 2009)</p>               |
|  <p style="text-align: center;">Icarin (<b>74</b>)</p>            | <p>Isolated from the terrestrial plant <i>Epimedium segittatum</i></p> | <p>Barnacle <i>A. amphitrite</i> (EC<sub>50</sub>: 52.17 μM, 35.3 μg/mL; LC<sub>50</sub>/EC<sub>50</sub> &gt; 2.8)</p>                                                                                             | <p>(Zhou, Zhang et al. 2009)</p>               |
|  <p style="text-align: center;">Rutin persulfate (<b>75</b>)</p> | <p>Synthesis</p>                                                       | <p>Mussel <i>M. galloprovincialis</i>, EC<sub>50</sub>: 22.59 μM; LC<sub>50</sub>/EC<sub>50</sub>: &gt;22.13.<br/>Inhibitory activity against marine bacteria <i>Vibrio harveyi</i> (EC<sub>50</sub>: 7.69 μM)</p> | <p>(Almeida, Correia-da-Silva et al. 2017)</p> |
|  <p style="text-align: center;"><b>76</b></p>                   | <p>Synthesis</p>                                                       | <p>Inhibitory activity against marine bacteria <i>Halomonas aquamarina</i> (EC<sub>50</sub>: 42.3 μM)</p>                                                                                                          | <p>(Almeida, Correia-da-Silva et al. 2017)</p> |



| 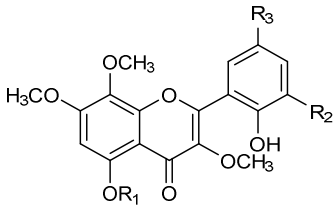 <p> <b>77:</b> R<sub>1</sub>=R<sub>2</sub>=R<sub>3</sub>=H<br/> <b>78:</b> R<sub>1</sub>=R<sub>3</sub>=H; R<sub>2</sub>=Cl<br/> <b>79:</b> R<sub>1</sub>=H; R<sub>2</sub>=Cl; R<sub>3</sub>=OH         </p>                                                                                                                                    | Isolated from the marine-derived fungus <i>Aspergillus candidus</i>                | Antidiatom activity against <i>C. socialis</i> :<br><b>77:</b> EC <sub>50</sub> : 11.62 μM, 4.0 μg/mL<br><b>78:</b> EC <sub>50</sub> : 16.63 μM, 6.3 μg/mL<br><b>79:</b> EC <sub>50</sub> : 18.75 μM, 7.4 μg/mL                                                                                                                                                                                                                                                                                                                                                        | (Haider, Ma et al. 2020)      |
|----------------------------------------------------------------------------------------------------------------------------------------------------------------------------------------------------------------------------------------------------------------------------------------------------------------------------------------------------------------------------------------------------------------------------------|------------------------------------------------------------------------------------|------------------------------------------------------------------------------------------------------------------------------------------------------------------------------------------------------------------------------------------------------------------------------------------------------------------------------------------------------------------------------------------------------------------------------------------------------------------------------------------------------------------------------------------------------------------------|-------------------------------|
|  <p> <b>80:</b> R<sub>1</sub>=R<sub>4</sub>=H; R<sub>2</sub>=R<sub>3</sub>=R<sub>5</sub>=R<sub>6</sub>=OH<br/> <b>81:</b> R<sub>1</sub>=R<sub>3</sub>=R<sub>4</sub>=R<sub>6</sub>=OH; R<sub>2</sub>=R<sub>5</sub>=H<br/> <b>82:</b> R<sub>1</sub>=R<sub>3</sub>=R<sub>4</sub>=R<sub>5</sub>=R<sub>6</sub>=H; R<sub>2</sub>=OCH<sub>3</sub> </p> | Commercial                                                                         | <b>80:</b> activity against diatoms <i>N. leavissima</i> (EC <sub>50</sub> : 54.33 μM, 16.42 μg/mL), <i>C. socialis</i> (EC <sub>50</sub> : 44.73 μM, 13.52 μg/mL) and <i>N. parva</i> (EC <sub>50</sub> : 18.76 μM, 5.67 μg/mL)<br><b>81:</b> activity against diatoms <i>N. leavissima</i> (EC <sub>50</sub> : 20.32 μM, 6.14 μg/mL), <i>C. socialis</i> (EC <sub>50</sub> : 19.52 μM, 5.90 μg/mL) and <i>N. parva</i> (EC <sub>50</sub> : 20.38 μM, 6.16 μg/mL)<br><b>82:</b> activity against diatom <i>C. socialis</i> (EC <sub>50</sub> : 37.54 μM, 10.07 μg/mL) | (Haider, Ma et al. 2020)      |
| <b>Flavones</b>                                                                                                                                                                                                                                                                                                                                                                                                                  |                                                                                    |                                                                                                                                                                                                                                                                                                                                                                                                                                                                                                                                                                        |                               |
| Code and structure of Flavonoid                                                                                                                                                                                                                                                                                                                                                                                                  | Origin                                                                             | Activity                                                                                                                                                                                                                                                                                                                                                                                                                                                                                                                                                               | Reference                     |
|  <p><b>83</b></p>                                                                                                                                                                                                                                                                                                                              | Commercial                                                                         | Mussel <i>M. edulis</i> (25% of the activity of positive control copper sulfate)                                                                                                                                                                                                                                                                                                                                                                                                                                                                                       | (Singh, Etoh et al. 1997)     |
|  <p>Luteolin 7-O-β-D-glucopyranosyl-2''-sulfate (<b>84</b>)</p>                                                                                                                                                                                                                                                                               | Isolated from the leaf tissue of the marine angiosperm <i>Thalassia testudinum</i> | Reduction of the attachment of thraustochytrid <i>Schizochytrium aggregatum</i> zoospores (IC <sub>50</sub> : 511.9 μM, 270 μg/mL)                                                                                                                                                                                                                                                                                                                                                                                                                                     | (Jensen, Jenkins et al. 1998) |

|                                                                                                                                                  |                                                                          |                                                                                                                                                                                                                                                        |                            |
|--------------------------------------------------------------------------------------------------------------------------------------------------|--------------------------------------------------------------------------|--------------------------------------------------------------------------------------------------------------------------------------------------------------------------------------------------------------------------------------------------------|----------------------------|
| 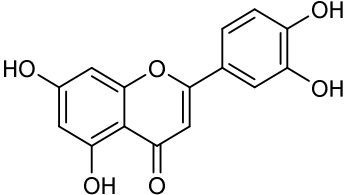 <p>Luteolin (<b>85</b>)</p>                                    | Isolated from the South China Sea seagrass <i>Enhalus acoroides</i>      | Activity against marine bacteria <i>Loktanella hongkongensis</i> (MIC: 174.68 $\mu$ M, 50 $\mu$ g/mL); low inhibition for bacteria <i>Pseudoalteromonas piscida</i> , <i>Rhodovulum</i> sp. and <i>Vibrio alginolyticus</i>                            | (Qi, Zhang et al. 2008)    |
|                                                                                                                                                  | Isolated from the terrestrial plant <i>Arachis hypogata</i>              | Activity against barnacle <i>A. amphitrite</i> larvae (EC <sub>50</sub> : 13.28 $\mu$ M, 3.8 $\mu$ g/mL; LC <sub>50</sub> /EC <sub>50</sub> > 13.2)                                                                                                    | (Zhou, Zhang et al. 2009)  |
|                                                                                                                                                  | Isolated from an extract of the leaves of eelgrass <i>Zostera marina</i> | Inhibition of the settlement of marine bacteria <i>Vibrio cyclitrophicus</i> and <i>Marivita litorea</i> at 14.5 $\mu$ g/mL                                                                                                                            | (Guan, Parrot et al. 2017) |
|                                                                                                                                                  | Commercial                                                               | Activity against diatoms <i>N. leavisissima</i> (EC <sub>50</sub> : 30.39 $\mu$ M, 8.70 $\mu$ g/mL), <i>C. socialis</i> (EC <sub>50</sub> : 21.59 $\mu$ M, 6.18 $\mu$ g/mL) and <i>N. parva</i> (EC <sub>50</sub> : 27.15 $\mu$ M, 7.77 $\mu$ g/mL)    | (Haider, Ma et al. 2020)   |
|  <p>Luteolin-4'-glucuronide (<b>86</b>)</p>                     | Isolated from the South China Sea seagrass <i>Enhalus acoroides</i>      | Activity against marine bacteria <i>L. hongkongensis</i> , <i>V. alginolyticus</i> , <i>Vibrio furnissii</i> and <i>Vibrio halioticoli</i> . Inhibition of <i>Bugula neritina</i> larval settlement (EC <sub>50</sub> : 1.12 $\mu$ M, 0.52 $\mu$ g/mL) | (Qi, Zhang et al. 2008)    |
|  <p>Apigenin (<b>87</b>): R<sub>1</sub>=R<sub>2</sub>=OH</p>   | Isolated from the terrestrial plant <i>Apium graveolens</i>              | Activity against barnacle <i>A. amphitrite</i> (EC <sub>50</sub> : 11.47 $\mu$ M, 3.1 $\mu$ g/mL; LC <sub>50</sub> /EC <sub>50</sub> > 16.1)                                                                                                           | (Zhou, Zhang et al. 2009)  |
|  <p>Primuletin (<b>88</b>): R<sub>1</sub>=R<sub>2</sub>=H</p> | Commercial                                                               | Activity against barnacle <i>A. amphitrite</i> (EC <sub>50</sub> : 11.75 $\mu$ M, 2.8 $\mu$ g/mL; LC <sub>50</sub> /EC <sub>50</sub> > 17.9)                                                                                                           | (Zhou, Zhang et al. 2009)  |

|                                                                                                                                                                                                                                                                                                                                                                                                                                                                                                             |                                                                                                      |                                                                                                                                                                                                                                                                                                                                                                                                                                                                                                                                                |                                         |
|-------------------------------------------------------------------------------------------------------------------------------------------------------------------------------------------------------------------------------------------------------------------------------------------------------------------------------------------------------------------------------------------------------------------------------------------------------------------------------------------------------------|------------------------------------------------------------------------------------------------------|------------------------------------------------------------------------------------------------------------------------------------------------------------------------------------------------------------------------------------------------------------------------------------------------------------------------------------------------------------------------------------------------------------------------------------------------------------------------------------------------------------------------------------------------|-----------------------------------------|
| 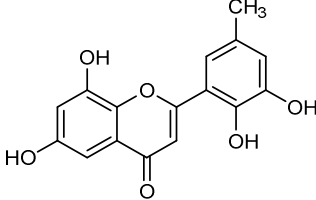 <p>6,8,2'3'-tetrahydroxy-5'-methylflavone (<b>89</b>)</p>                                                                                                                                                                                                                                                                                                                                                                 | <p>Isolated from a broth of gorgonian coral-associated fungus <i>Penicillium</i> sp. SCSGAF 0023</p> | <p>Activity against barnacle <i>A. Amphitrite</i> (EC<sub>50</sub> value of 22.35 μM, 6.71 μg/mL; LC<sub>50</sub>/EC<sub>50</sub> ratio &gt;14.9)</p>                                                                                                                                                                                                                                                                                                                                                                                          | <p>(Bao, Sun et al. 2013)</p>           |
|  <p>Luteolin-7-sulfate (<b>90</b>)</p>                                                                                                                                                                                                                                                                                                                                                                                     | <p>Isolated from an extract of the leaves of eelgrass <i>Zostera marina</i></p>                      | <p>Inhibition of the settlement of marine bacteria <i>V. cyclitrophicus</i> and <i>M. litorea</i> at 14.5 μg/mL</p>                                                                                                                                                                                                                                                                                                                                                                                                                            | <p>(Guan, Parrot et al. 2017)</p>       |
|  <p><b>91:</b> R<sub>1</sub>=R<sub>3</sub>=R<sub>4</sub>=R<sub>5</sub>=OCH<sub>3</sub>, R<sub>2</sub>=H<br/> <b>92:</b> R<sub>1</sub>=R<sub>4</sub>=OH, R<sub>2</sub>=R<sub>3</sub>=R<sub>5</sub>=OCH<sub>3</sub><br/> <b>93:</b> R<sub>1</sub>=R<sub>4</sub>=R<sub>5</sub>=H, R<sub>2</sub>=R<sub>3</sub>=OH<br/> <b>94:</b> R<sub>1</sub>=R<sub>2</sub>=R<sub>3</sub>=H, R<sub>4</sub>=R<sub>5</sub>=OCH<sub>3</sub></p> | <p>Commercial</p>                                                                                    | <p><b>91:</b> active against diatoms <i>N. leavissima</i> (EC<sub>50</sub>: 26.52 μM, 9.08 μg/mL) and <i>C. socialis</i> (EC<sub>50</sub>: 10.75 μM, 3.68 μg/mL)<br/> <b>92:</b> active against diatoms <i>N. leavissima</i> (EC<sub>50</sub>: 58.32 μM, 20.08 μg/mL) and <i>C. socialis</i> (EC<sub>50</sub>: 25.15 μM, 8.66 μg/mL)<br/> <b>93:</b> active against diatom <i>C. socialis</i> (EC<sub>50</sub>: 57.15 μM, 14.53 μg/mL)<br/> <b>94:</b> active against diatom <i>N. leavissima</i> (EC<sub>50</sub>: 55.19 μM, 15.58 μg/mL)</p> | <p>(Haider, Ma et al. 2020)</p>         |
|  <p><b>95</b></p>                                                                                                                                                                                                                                                                                                                                                                                                        | <p>Synthesis</p>                                                                                     | <p>Activity against mussel <i>M. galloprovincialis</i> mussel larvae (EC<sub>50</sub>: 8.34 μM, 2.87 μg/mL)</p>                                                                                                                                                                                                                                                                                                                                                                                                                                | <p>(Pereira, Gonçalves et al. 2021)</p> |
| <p>Flavanones</p>                                                                                                                                                                                                                                                                                                                                                                                                                                                                                           |                                                                                                      |                                                                                                                                                                                                                                                                                                                                                                                                                                                                                                                                                |                                         |

| Code and structure of Flavonoid                                                                                                                          | Origin                                                                                | Activity                                                                                                                                                                                        | Reference                    |
|----------------------------------------------------------------------------------------------------------------------------------------------------------|---------------------------------------------------------------------------------------|-------------------------------------------------------------------------------------------------------------------------------------------------------------------------------------------------|------------------------------|
| 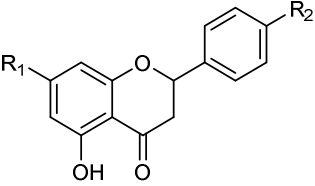 <p>Naringenin (<b>96</b>): R<sub>1</sub>=R<sub>2</sub>=OH</p>          | Isolated from the methanol extract of the bark of <i>Prunus jamasakura</i>            | Low anti-settlement activity against <i>M. edulis</i> at 1.2 mg/cm <sup>2</sup> concentration (11% of the activity of positive control copper sulfate at 0.08 mg/cm <sup>2</sup> concentration) | (Yoshioka, Etoh et al. 1990) |
|                                                                                                                                                          | Commercial                                                                            | 11% activity against mussel <i>M. edulis</i> comparing to positive control copper sulfate                                                                                                       | (Singh, Etoh et al. 1997)    |
|  <p>Naringin (<b>97</b>): R<sub>1</sub>=O-Glc-Rha, R<sub>2</sub>=OH</p> | Commercial                                                                            | 24% activity against mussel <i>M. edulis</i> comparing to positive control copper sulfate                                                                                                       | (Singh, Etoh et al. 1997)    |
|  <p>Pinocembrin (<b>98</b>): R<sub>1</sub>=OH, R<sub>2</sub>=H</p>      | Isolated from <i>Eucalyptus signata</i>                                               | 25% activity against mussel <i>M. edulis</i> comparing to positive control copper sulfate                                                                                                       | (Singh, Etoh et al. 1997)    |
|  <p>2'-methoxykuraridinone (<b>99</b>)</p>                             | Isolated from the ethyl acetate extract of the Chinese herb <i>Sophora flavescens</i> | Anti-settlement activity against <i>Balanus albicostatus</i> (EC <sub>50</sub> : 4.46 μM, 2.02 μg/mL; LC <sub>50</sub> value > 25 μg/mL)                                                        | (Feng, Ke et al. 2009)       |
| Isoflavones                                                                                                                                              |                                                                                       |                                                                                                                                                                                                 |                              |
| Code and structure of Flavonoid                                                                                                                          | Origin                                                                                | Activity                                                                                                                                                                                        | Reference                    |

|                                                                                                                         |                                                                                                  |                                                                                                                                                                                                                                                                                                                                   |                              |
|-------------------------------------------------------------------------------------------------------------------------|--------------------------------------------------------------------------------------------------|-----------------------------------------------------------------------------------------------------------------------------------------------------------------------------------------------------------------------------------------------------------------------------------------------------------------------------------|------------------------------|
| 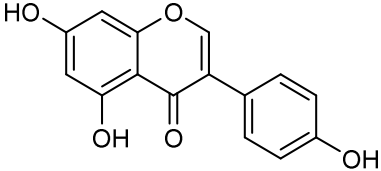 <p>Genistein (<b>100</b>)</p>         | Isolated from the bark of <i>Prunus jamasakura</i>                                               | Low anti-settlement activity against <i>M. edulis</i> at 1.6 mg/cm <sup>2</sup> concentration (9% of the activity of positive control copper sulfate at a concentration of 0.08 mg/cm <sup>2</sup> )                                                                                                                              | (Yoshioka, Etoh et al. 1990) |
|                                                                                                                         | Commercial                                                                                       | Low anti-settlement activity against <i>M. edulis</i> (9% of the activity comparing to positive control copper sulfate)                                                                                                                                                                                                           | (Singh, Etoh et al. 1997)    |
|                                                                                                                         | Isolated from the plant <i>Genista tinctoria</i>                                                 | Anti-settlement activity against barnacle <i>A. amphitrite</i> (EC <sub>50</sub> : 11.10 μM, 3.0 μg/mL; LC <sub>50</sub> /EC <sub>50</sub> : >16.7)<br>Density of barnacles in panels coated with paint containing genistein was significantly lower after one month of a field assay when compared with the control panel tests. | (Zhou, Zhang et al. 2009)    |
|  <p>8-O-methylretusin (<b>101</b>)</p> | Isolated from the plant <i>Pueraria alopecuroides</i>                                            | Anti-settlement activity against barnacle <i>A. amphitrite</i> (EC <sub>50</sub> : 44.59 μM, 13.3 μg/mL)                                                                                                                                                                                                                          | (Zhou, Zhang et al. 2009)    |
|                                                                                                                         | Isolated from the methanol extract of the leaves of the marine halophyte <i>Apocynum venetum</i> | Activity against bacteria <i>B. thuringiensis</i> (inhibition zone 9.4 mm) and <i>P. aeruginosa</i> (inhibition zone 10.5 mm) at a concentration of 100 μg/disc, the positive control chloramphenicol: inhibition zone of 33.7 and 30.3 mm at the same concentration                                                              | (Kong, Fang et al. 2014)     |
|  <p>Biochanin A (<b>102</b>)</p>     | Commercial                                                                                       | Activity against diatom <i>C. socialis</i> (EC <sub>50</sub> : 28.60 μM, 8.13 μg/mL)                                                                                                                                                                                                                                              | (Haider, Ma et al. 2020)     |
| Other flavonoids                                                                                                        |                                                                                                  |                                                                                                                                                                                                                                                                                                                                   |                              |
| Code and structure of Flavonoid                                                                                         | Origin                                                                                           | Activity                                                                                                                                                                                                                                                                                                                          | Reference                    |

|                                                                                                                       |                                                                                                  |                                                                                                                                                                                                                                                                                                                                                                                                                                                                                                                                                                                                                                                                                                                                                                                                                                                                                                                                                      |                                           |
|-----------------------------------------------------------------------------------------------------------------------|--------------------------------------------------------------------------------------------------|------------------------------------------------------------------------------------------------------------------------------------------------------------------------------------------------------------------------------------------------------------------------------------------------------------------------------------------------------------------------------------------------------------------------------------------------------------------------------------------------------------------------------------------------------------------------------------------------------------------------------------------------------------------------------------------------------------------------------------------------------------------------------------------------------------------------------------------------------------------------------------------------------------------------------------------------------|-------------------------------------------|
| 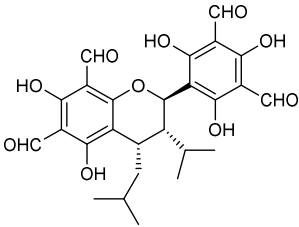 <p>Sideroxylonal A (<b>103</b>)</p> | Isolated from the leaves of <i>Eucalyptus grandis</i>                                            | High activity against mussel <i>M. edulis</i> at a concentration of 0.032 $\mu\text{mol}/\text{cm}^2$                                                                                                                                                                                                                                                                                                                                                                                                                                                                                                                                                                                                                                                                                                                                                                                                                                                | (Singh, Takahashi et al. 1996)            |
|  <p>Grandinal (<b>104</b>)</p>       | Isolated from the methanolic extract of the leaves of <i>E. grandis</i>                          | Activity against mussel <i>M. edulis</i> (same activity as the positive control copper sulfate)                                                                                                                                                                                                                                                                                                                                                                                                                                                                                                                                                                                                                                                                                                                                                                                                                                                      | (Singh, Hayakawa et al. 1997)             |
|  <p>Epicatechin (<b>105</b>)</p>     | Isolated from the methanol extract of the leaves of the marine halophyte <i>Apocynum venetum</i> | Activity against bacteria <i>B. thuringiensis</i> (inhibition zone: 9.2 mm), <i>P. elyakovii</i> (inhibition zone: 10.6 mm) and <i>P. aeruginosa</i> (inhibition zone: 10.9 mm) at 100 $\mu\text{g}/\text{disc}$ (positive control chloramphenicol: inhibition zone 29.2 – 33.7 mm at the same concentration)                                                                                                                                                                                                                                                                                                                                                                                                                                                                                                                                                                                                                                        | (Kong, Fang et al. 2014)                  |
|  <p>Taxifolin (<b>106</b>)</p>     | Isolated from the mangrove derived actinobacterium <i>Streptomyces sampsonii</i> (PM33)          | - Activity against bacteria <i>Staphylococcus</i> sp. M1 (MIC: 5.32 $\mu\text{M}$ , 1.62 $\mu\text{g}/\text{mL}$ ), <i>Micrococcus</i> sp. M50 (MIC: 10.27 $\mu\text{M}$ , 3.125 $\mu\text{g}/\text{mL}$ ), <i>Lactobacillus</i> sp. M6 (MIC: 10.27 $\mu\text{M}$ , 3.125 $\mu\text{g}/\text{mL}$ ), <i>Bacillus</i> sp. N16 (MIC: 5.32 $\mu\text{M}$ , 1.62 $\mu\text{g}/\text{mL}$ ), <i>Aeromonas</i> sp. N8 (MIC: 20.54 $\mu\text{M}$ , 6.25 $\mu\text{g}/\text{mL}$ ), <i>Alcaligenes</i> sp. P2 (MIC: 20.54 $\mu\text{M}$ , 6.25 $\mu\text{g}/\text{mL}$ ), <i>Alcaligenes</i> sp. N22 (MIC: 20.54 $\mu\text{M}$ , 6.25 $\mu\text{g}/\text{mL}$ ), <i>Alcaligenes</i> sp. E4 (MIC: 20.54 $\mu\text{M}$ , 6.25 $\mu\text{g}/\text{mL}$ ), <i>Vibrio</i> sp. M25 (MIC: 41.08 $\mu\text{M}$ , 12.5 $\mu\text{g}/\text{mL}$ ), <i>Pseudomonas</i> sp. P1 (MIC: 82.17 $\mu\text{M}$ , 25 $\mu\text{g}/\text{mL}$ ), <i>Pseudomonas</i> sp. N9 (MIC: | (Gopikrishnan, Radhakrishnan et al. 2019) |

|  |  |                                                                                                                                                                                                                                                                 |  |
|--|--|-----------------------------------------------------------------------------------------------------------------------------------------------------------------------------------------------------------------------------------------------------------------|--|
|  |  | 82.17 µM, 25 µg/mL) and <i>Kurthia</i> sp. P3 (MIC: 41.08 µM, 12.5 µg/mL);<br>- Reduction of more than 70% of the <i>Anabaena</i> sp. and <i>Nostoc</i> sp. spore germination at 100 µg/mL;<br>- Decrease of the foot adherence of mussel <i>Perna indica</i> . |  |
|--|--|-----------------------------------------------------------------------------------------------------------------------------------------------------------------------------------------------------------------------------------------------------------------|--|

Almeida, J. R., M. Correia-da-Silva, E. Sousa, J. Antunes, M. Pinto, V. Vasconcelos and I. Cunha (2017). "Antifouling potential of Nature-inspired sulfated compounds." Scientific Reports 7(1): 42424.

Almeida, J. R., J. Moreira, D. Pereira, S. Pereira, J. Antunes, A. Palmeira, V. Vasconcelos, M. Pinto, M. Correia-da-Silva and H. Cidade (2018). "Potential of synthetic chalcone derivatives to prevent marine biofouling." Science of The Total Environment 643: 98-106.

Bao, J., Y.-L. Sun, X.-Y. Zhang, Z. Han, H.-C. Gao, F. He, P.-Y. Qian and S.-H. Qi (2013). "Antifouling and antibacterial polyketides from marine gorgonian coral-associated fungus *Penicillium* sp. SCSGAF 0023." The Journal of Antibiotics 66(4): 219-223.

Feng, D. Q., C. H. Ke, C. Y. Lu and S. J. Li (2009). "Herbal plants as a promising source of natural antifoulants: evidence from barnacle settlement inhibition." Biofouling 25(3): 181-190.

Gopikrishnan, V., M. Radhakrishnan, T. Shanmugasundaram, R. Pazhanimurugan and R. Balagurunathan (2016). "Antibiofouling potential of quercetin compound from marine-derived actinobacterium, *Streptomyces fradiae* PE7 and its characterization." Environmental Science and Pollution Research 23(14): 13832-13842.

Gopikrishnan, V., M. Radhakrishnan, T. Shanmugasundaram, M. P. Ramakodi and R. Balagurunathan (2019). "Isolation, characterization and identification of antibiofouling metabolite from mangrove derived *Streptomyces sampsonii* PM33." Scientific Reports 9(1): 12975.

Guan, C., D. Parrot, J. Wiese, F. D. Sönnichsen, M. Saha, D. Tasdemir and F. Weinberger (2017). "Identification of rosmarinic acid and sulfated flavonoids as inhibitors of microfouling on the surface of eelgrass *Zostera marina*." Biofouling 33(10): 867-880.

Haider, W., J. Ma, X.-M. Hou, M.-Y. Wei, J.-Y. Zheng and C.-L. Shao (2020). "Natural Flavones and their Preliminary Structure–Antifouling Activity Relationship." Chemistry of Natural Compounds 56(2): 334-337.

Jensen, P. R., K. M. Jenkins, D. Porter and W. Fenical (1998). "Evidence that a New Antibiotic Flavone Glycoside Chemically Defends the Sea Grass *Thalassia testudinum* against Zoospore Fungi." Applied and Environmental Microbiology 64(4): 1490-1496.

Kong, N.-N., S.-T. Fang, Y. Liu, J.-H. Wang, C.-Y. Yang and C.-H. Xia (2014). "Flavonoids from the halophyte *Apocynum venetum* and their antifouling activities against marine biofilm-derived bacteria." Natural Product Research 28(12): 928-931.

Pereira, D., C. Gonçalves, B. T. Martins, A. Palmeira, V. Vasconcelos, M. Pinto, J. R. Almeida, M. Correia-da-Silva and H. Cidade (2021) "Flavonoid Glycosides with a Triazole Moiety for Marine Antifouling Applications: Synthesis and Biological Activity Evaluation." Marine Drugs 19 DOI: 10.3390/md19010005.

Qi, S.-H., S. Zhang, P.-Y. Qian and B.-G. Wang (2008). "Antifeedant, antibacterial, and antilarval compounds from the South China Sea seagrass *Enhalus acoroides*." Botanica Marina **51**(5): 441-447.

Sathicq, Á., A. Paola, M. Pérez, O. Dallesandro, M. García, J. P. Roldán, G. Romanelli and G. Blustein (2019). "Furylchalcones as new potential marine antifoulants." International Biodeterioration & Biodegradation **143**: 104730.

Singh, I. P., H. Etoh, E. Asai, K. Kikuchi, K. Ina, K. Koyasu and Y. Terada (1997). "Flavonoids and Stilbenes as Repellents against the Blue Mussel, *Mytilus edulis galloprovincialis*." Natural Product Sciences **3**(1): 49-54.

Singh, I. P., R. Hayakawa, H. Etoh, M. Takasaki and T. Konoshima (1997). "Grandinal, a New Phloroglucinol Dimer from *Eucalyptus grandis*." Bioscience, Biotechnology, and Biochemistry **61**(5): 921-923.

Singh, I. P., K. Takahashi and H. Etoh (1996). "Potent Attachment-inhibiting and -promoting Substances for the Blue Mussel, *Mytilus edulis galloprovincialis*, from Two Species of *Eucalyptus*." Bioscience, Biotechnology, and Biochemistry **60**(9): 1522-1523.

Sivakumar, P. M., V. Prabhawathi and M. Doble (2010). "2-Methoxy-2',4'-dichloro chalcone as an antimicrofoulant against marine bacterial biofilm." Colloids and Surfaces B: Biointerfaces **81**(2): 439-446.

Sivakumar, P. M., V. Prabhawathi and M. Doble (2010). "Antibacterial activity and QSAR of chalcones against biofilm-producing bacteria isolated from marine waters." SAR and QSAR in Environmental Research **21**(3-4): 247-263.

Yamashita, N., H. Etoh, K. Sakata, A. Yagi, H. Ina and K. Ina (1989). "An Acylated Kaempferol Glucoside Isolated from *Quercus dentata* as a Repellent against the Blue Mussel *Mytilus edulis*." Agricultural and Biological Chemistry **53**(5): 1383-1385.

Yoshioka, A., H. Etoh, A. Yagi, K. Sakata and K. Ina (1990). "Isolation of Flavonoids and Cerebrosides from the Bark of *Prunus jamasakura* as Repellents against the Blue Mussel, *Mytilus edulis*." Agricultural and Biological Chemistry **54**(12): 3355-3356.

Zhou, X., Z. Zhang, Y. Xu, C. Jin, H. He, X. Hao and P.-Y. Qian (2009). "Flavone and isoflavone derivatives of terrestrial plants as larval settlement inhibitors of the barnacle *Balanus amphitrite*." Biofouling **25**(1): 69-76.
